# Supplementary material for: Hotspots in action: near-infrared light mediated photoelectrochemical oxygen evolution on high index faceted plasmonic gold nanoarchitectures
Source: Royal Society of Chemistry journal article supplement (doi:10.1039/d2nr02741k), 2022-01-01
Supplement: d2nr02741k1.pdf [file d2nr02741k1.pdf]

Supporting Information

**Hotspots on Action: Near-infrared Light Mediated Photo Electrochemical Oxygen Evolution on High Index Facet Plasmonic Gold Nano Architectures.**

*Sanjeevan Rajagopal<sup>1</sup>, Suresh Thangudu<sup>1</sup>, June-Yen Feng<sup>1</sup>, Pavithra Sriam<sup>2</sup>, Ta-Jen Yen<sup>2</sup>, and Kuo Chu Hwang<sup>1\*</sup>*

1. *Department of Chemistry, National Tsing Hua University, Hsinchu 30013, Taiwan, R.O.C.*

2. *Department of Materials Science and Engineering, National Tsing Hua University, Hsinchu, 30013, Taiwan, R.O.C.*

\*E-mail: [kchwang@mx.nthu.edu.tw](mailto:kchwang@mx.nthu.edu.tw)

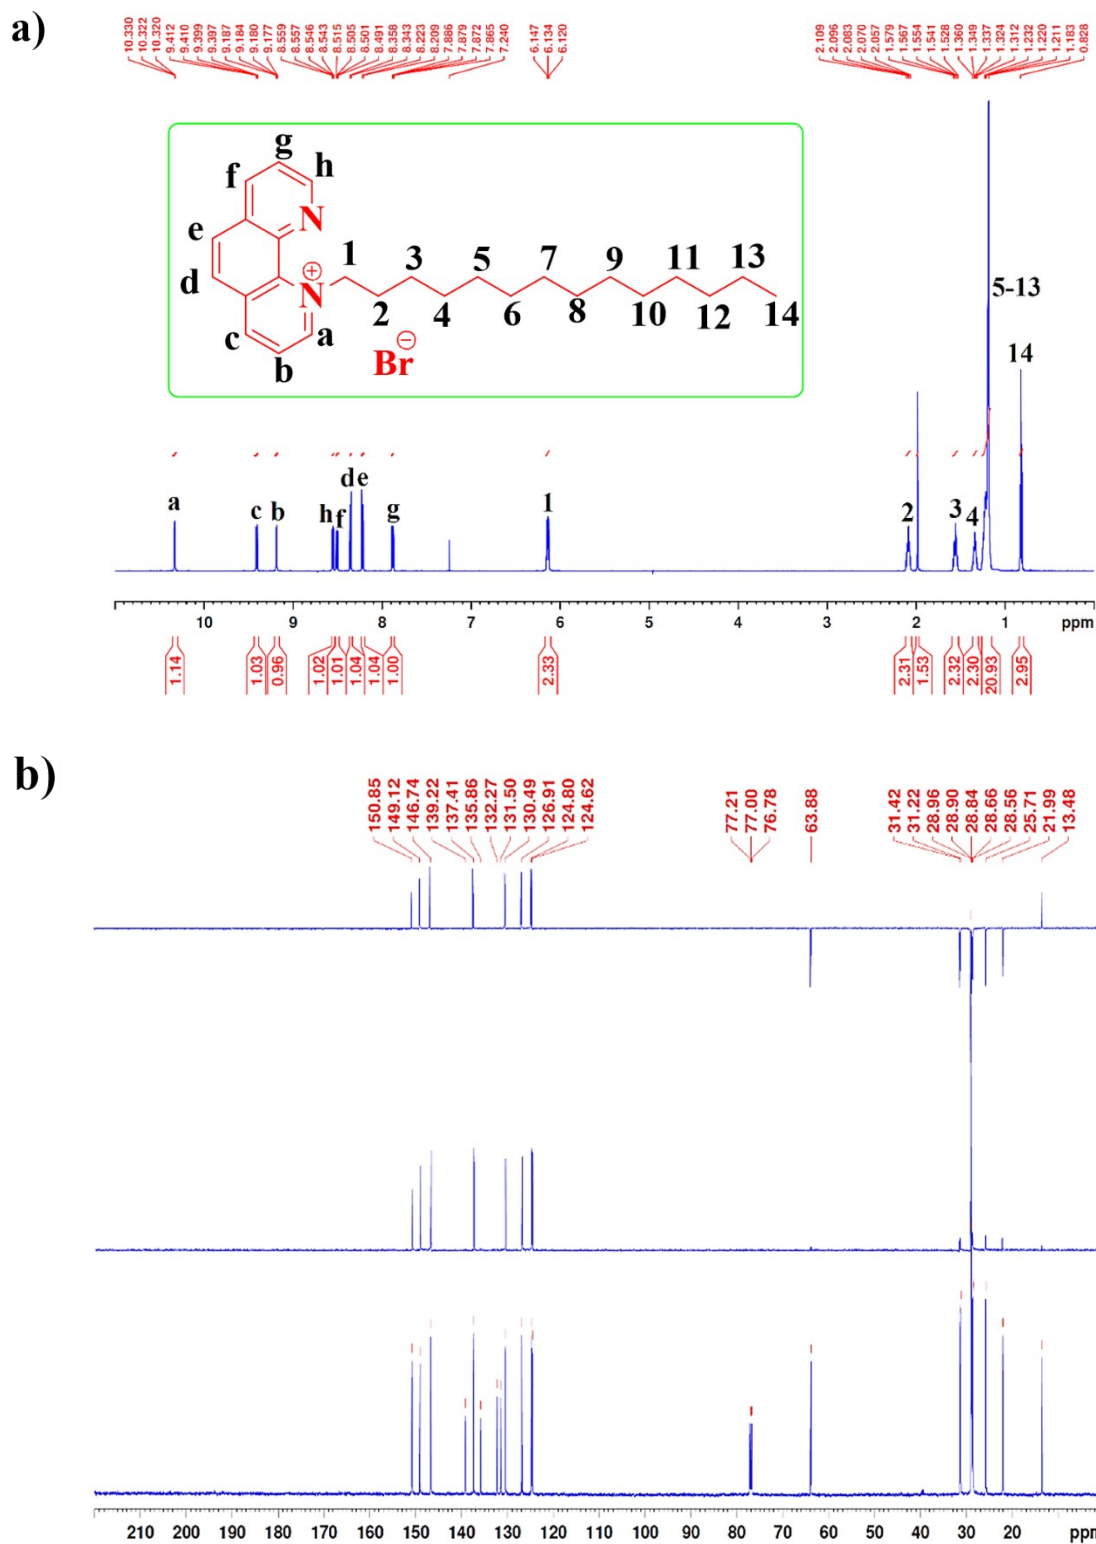

**Figure S1.** (a) <sup>1</sup>H-NMR and (b) <sup>13</sup>C-NMR for 1-tetradecyl-1, 10-phenanthroline-1-ium bromide surfactant dissolved in D-chloroform solvent.

(1-tetradecyl-1, 10-phenanthroline-1-ium bromide)

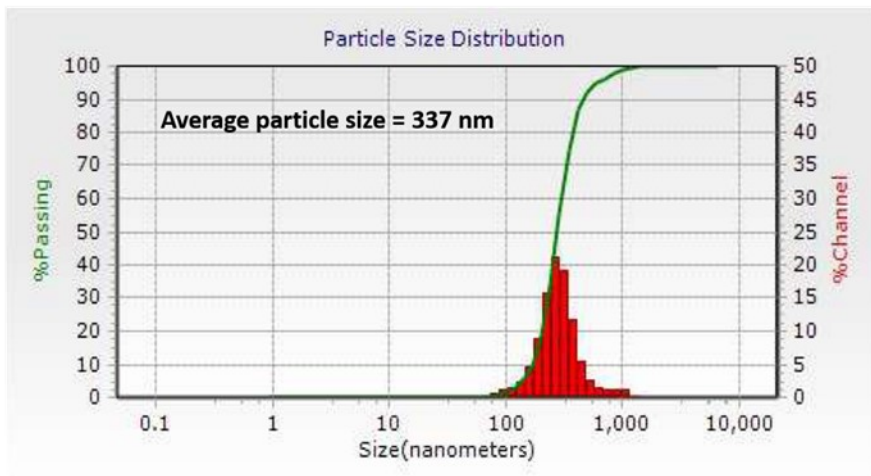

**Figure S2.** Dynamic light scattering analysis spectra of Au 12 tips aqueous solution (DLS, model W3180, Microtrac).

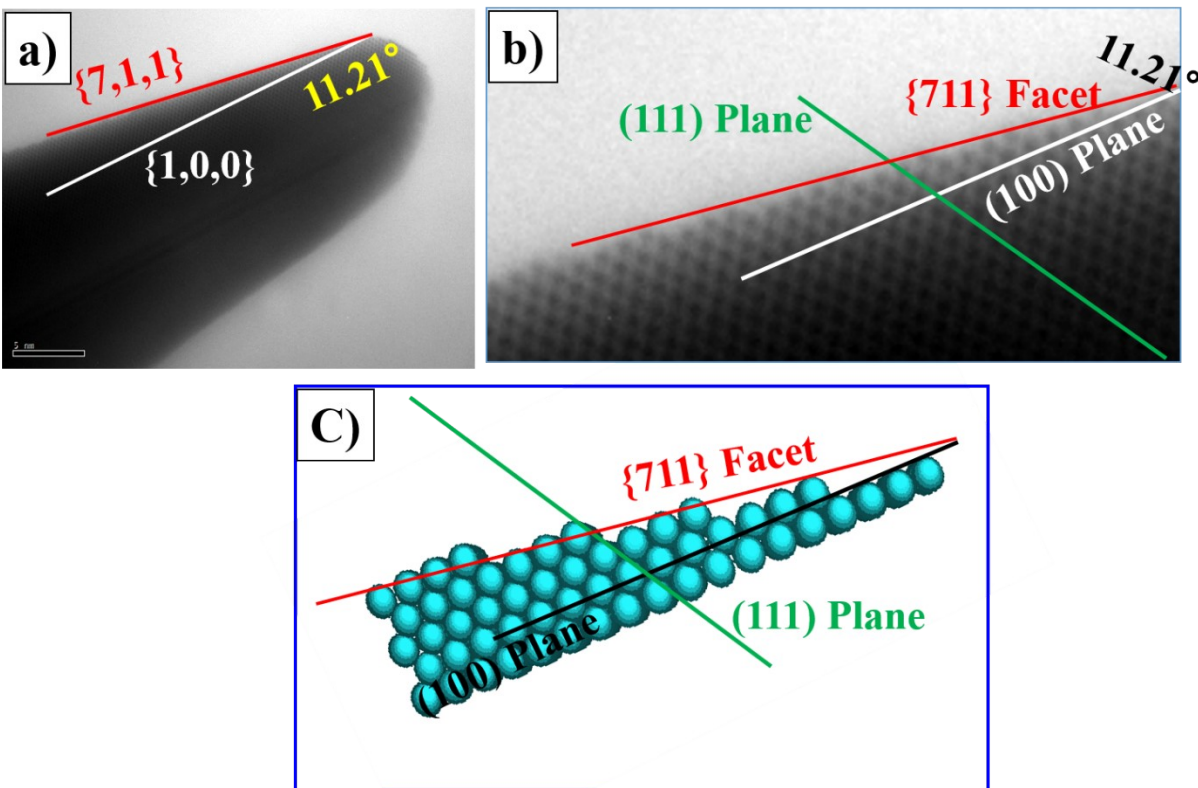

**Figure S3.** (a) TEM image of one of the sharp tips of Au 12 tips nanostars. (b) HRTEM image, (c) the atomic model of the  $\{711\}$  planes projected along the  $[-1, 1, 1]$  and  $[-1, 1, 0]$  zone axis.

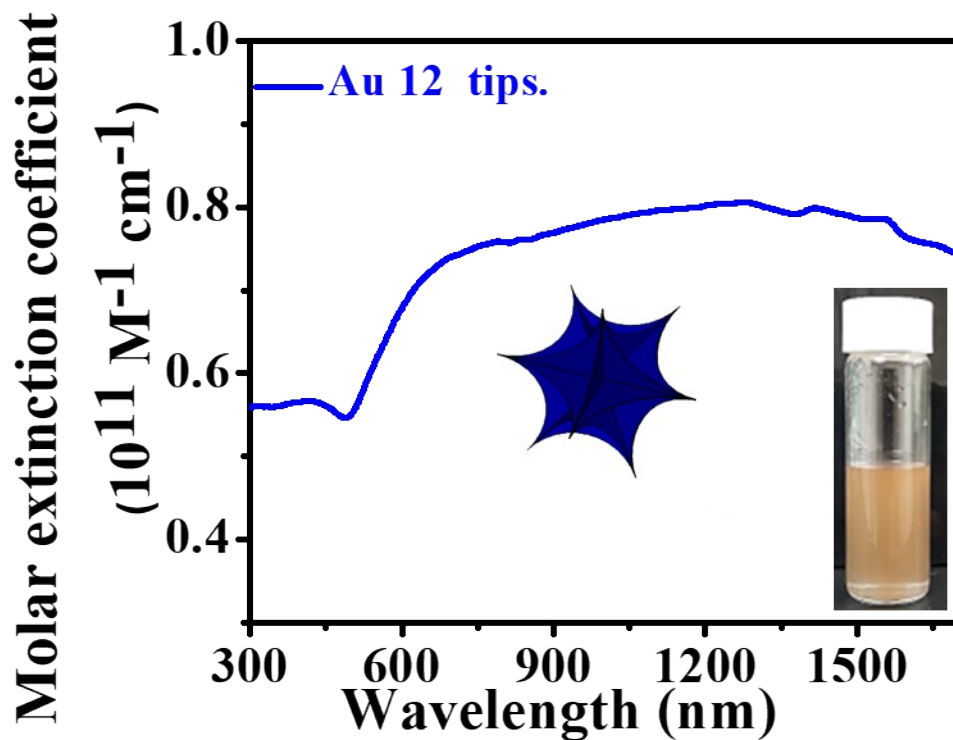

**Figure S4.** Molar extinction coefficients of Au 12 tips nanostars as a function of wavelengths (The inset shows the optical image of Au 12 tips nanostars-containing aqueous dispersion).

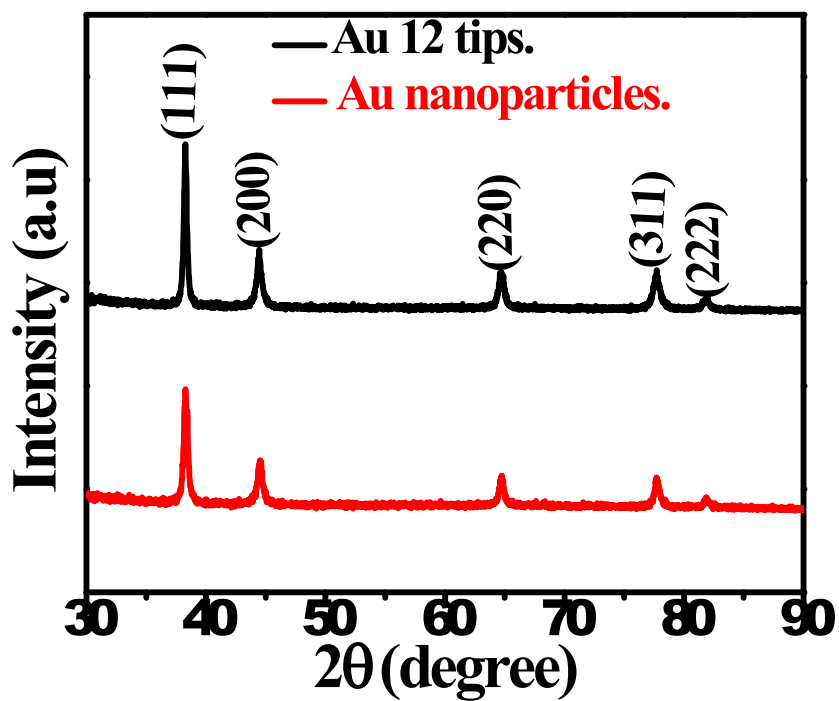

Figure S5. XRD pattern for Au 12 tips nanostars and Au nanoparticles.

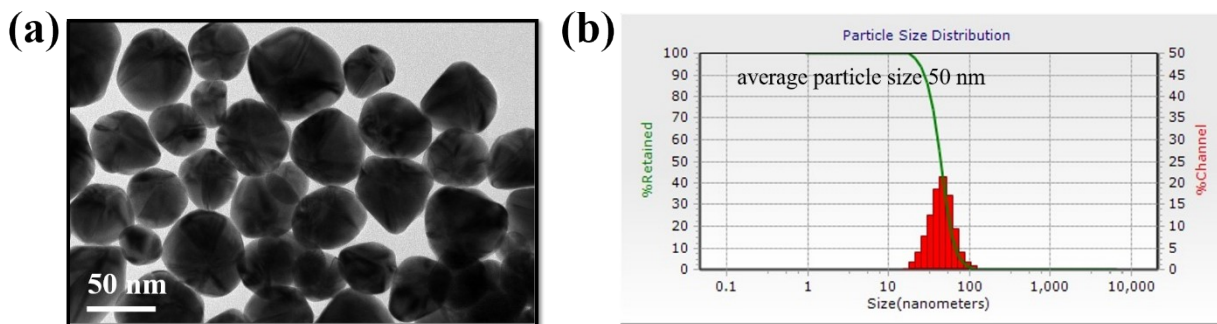

Figure S6. (a) TEM image and (b) DLS spectra of Au nanoparticles.

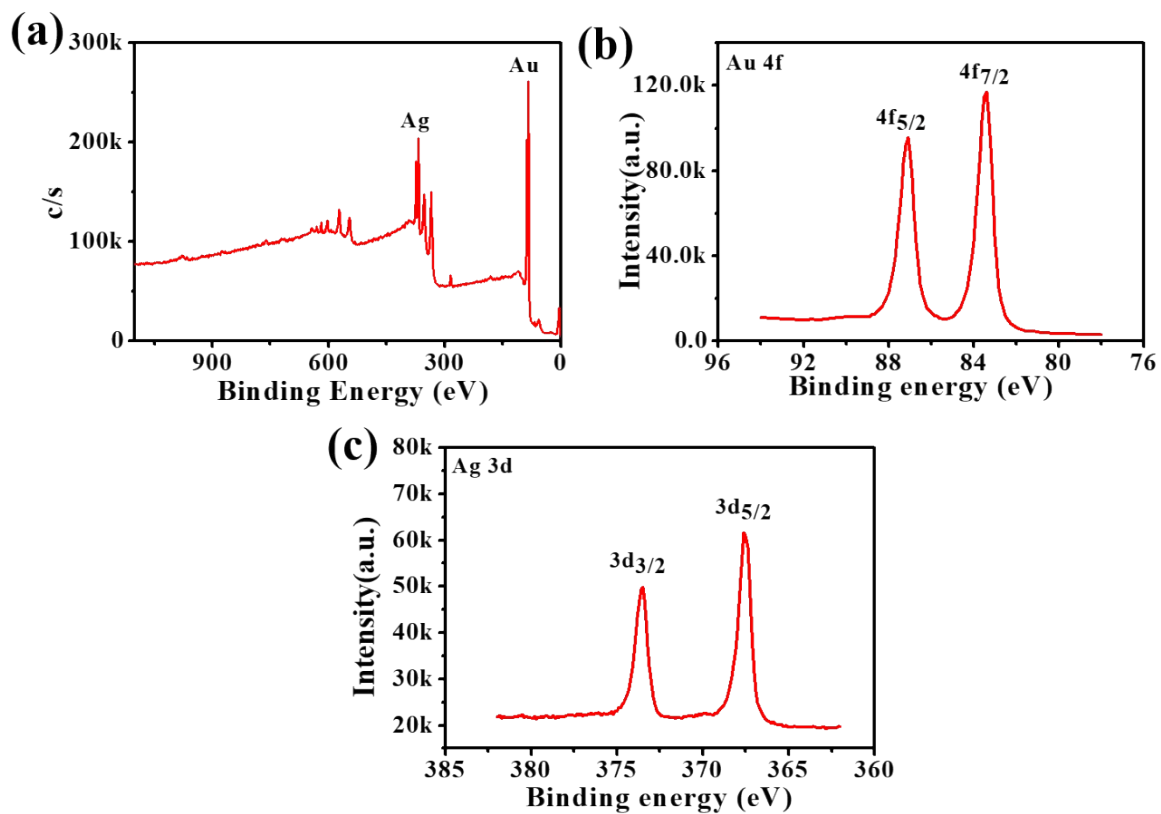

**Figure S7.** XPS spectra of Au 12 tips nanostars, (a) survey scan (b) high-resolution of Au 4f, and (c) high-resolution of Ag 3d.

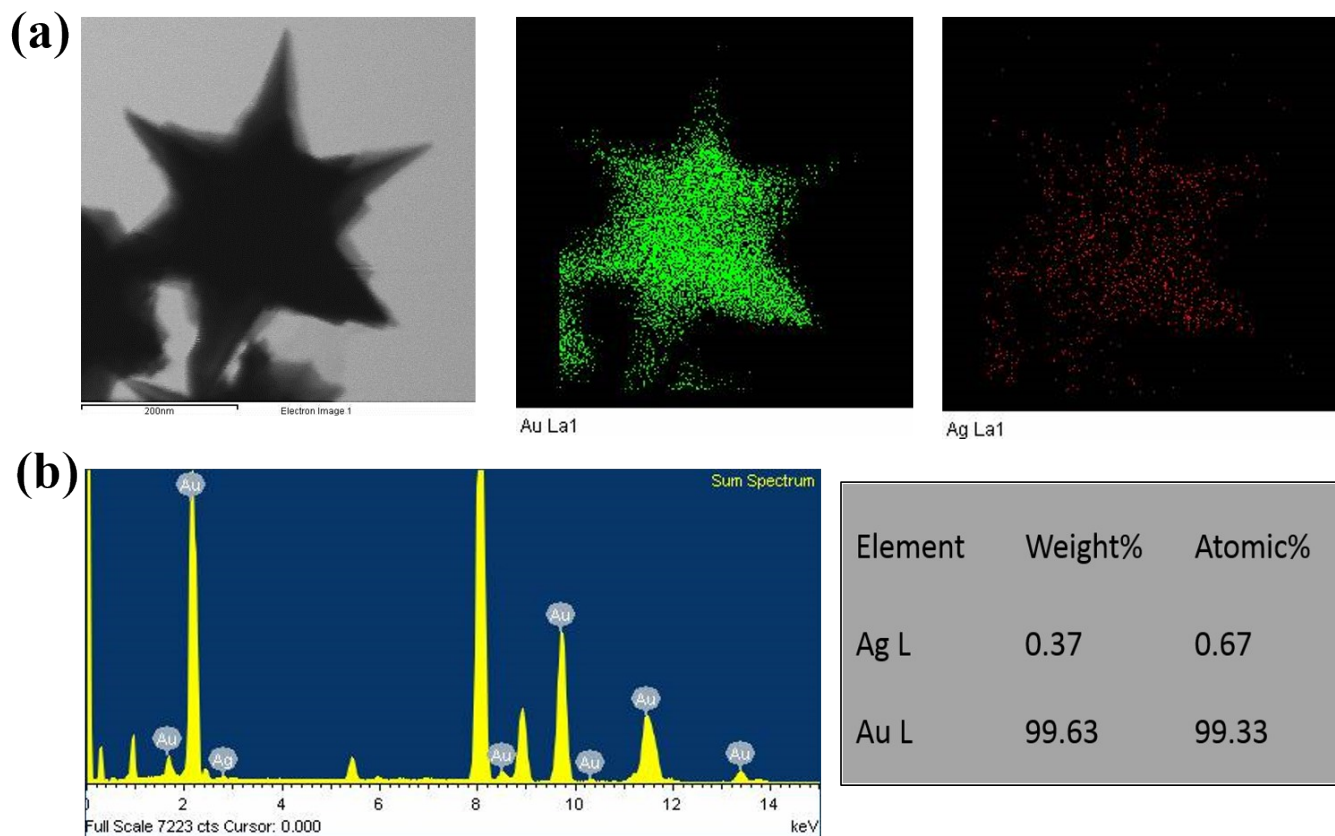

**Figure S8.** (a) EDX elemental mapping for Au 12 tips nanostars, (b) the corresponding EDX elemental spectrum and atomic percentage.

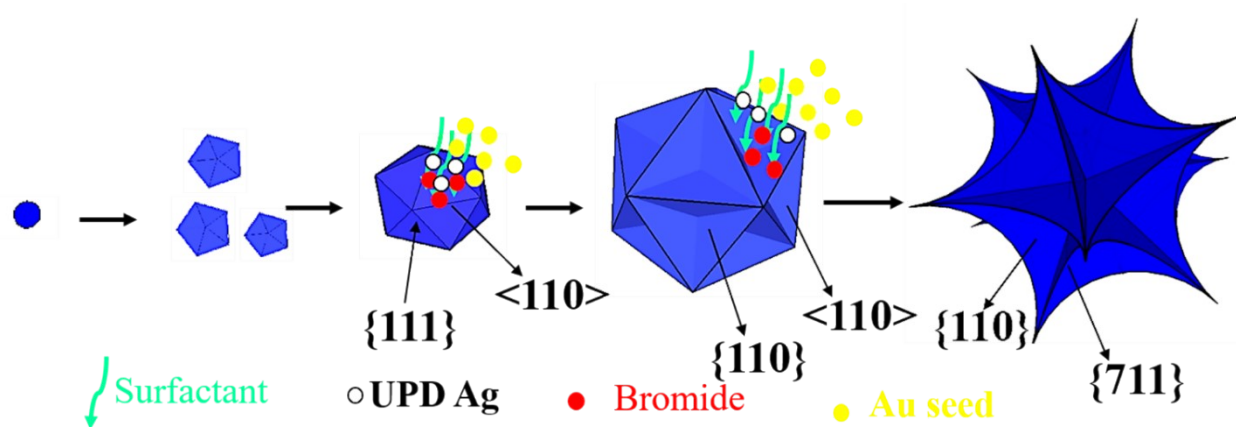

**Figure S9.** Schematic illustration of the formation and growth mechanism of Au 12 tips nanostars.

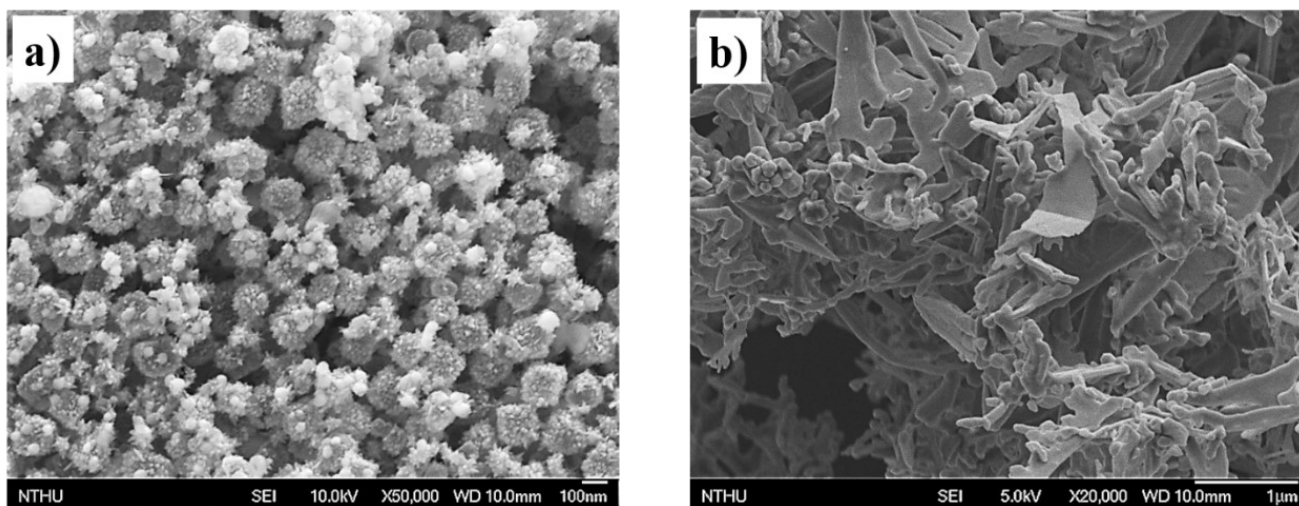

**Figure S10.** SEM images (a) without TDPB surfactant and (b) without  $\text{AgNO}_3$ .

| Time (minutes) | Intensity ratio of I(111)/I(200) |
|----------------|----------------------------------|
| 60             | 3.78                             |
| 45             | 3.73                             |
| 30             | 3.65                             |
| 15             | 3.54                             |
| 10             | 3.17                             |
| 5              | 2.70                             |
| 2              | 1.95                             |

**Figure S11.** XRD peak intensity ratio (111) / (200) during the formation of Au 12 tips nanostars.



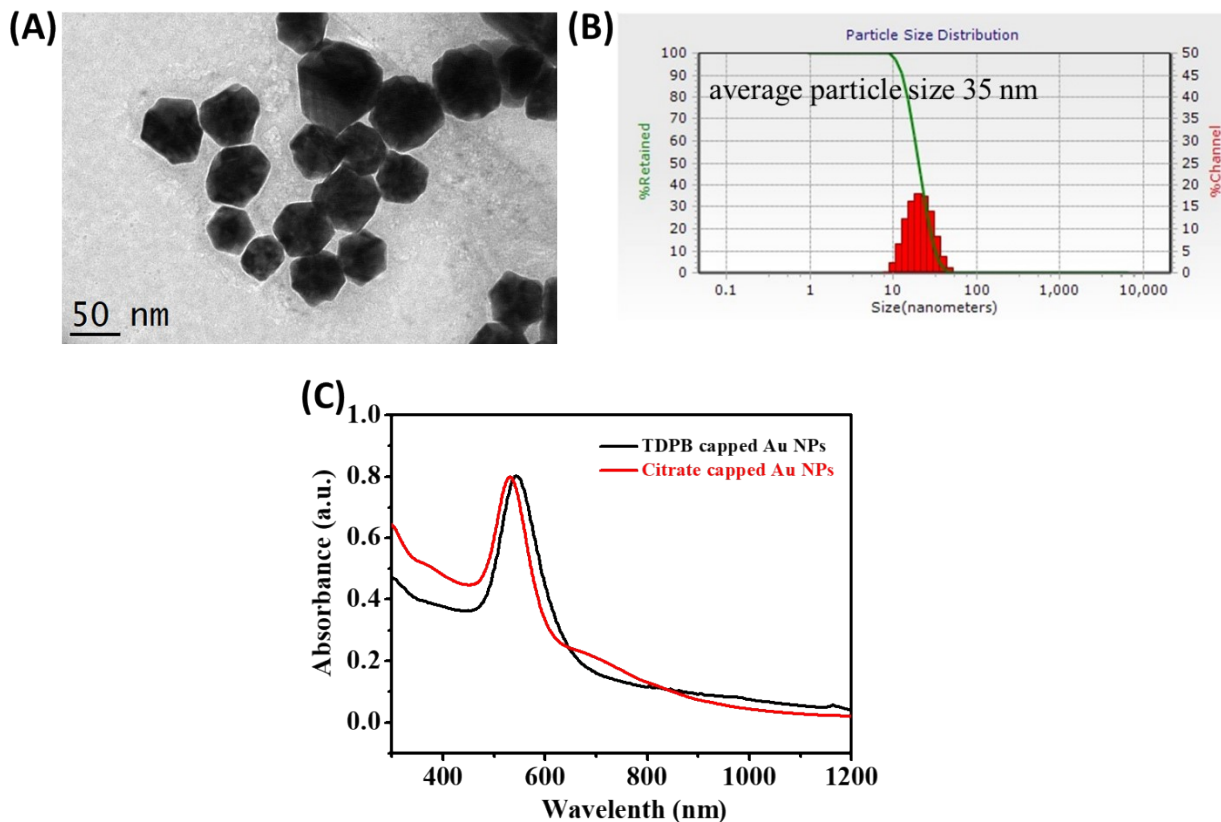

**Figure S12.** TDPB coated Au NPs. (A) TEM image of Au NPs, (B) DLS size distribution spectra, (C) absorption spectra of NPs. (D) LSV curves corresponding to the photoelectrochemical OER on TDPB-capped Au NPs under dark, 532 nm and 915 nm laser irradiation conditions.

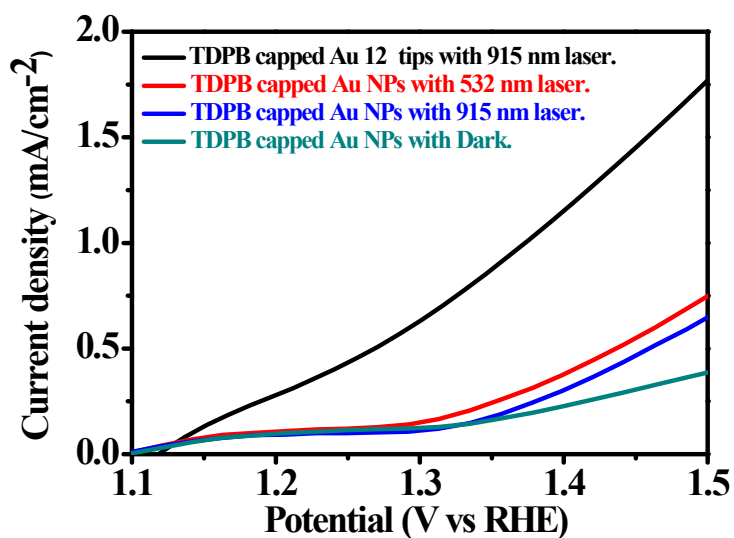

**Figure S13.** LSV curves corresponding to the photoelectrochemical OER on TDPB-capped Au NPs and TDPB-capped Au 12 tips-electrodes under dark and light conditions, respectively.

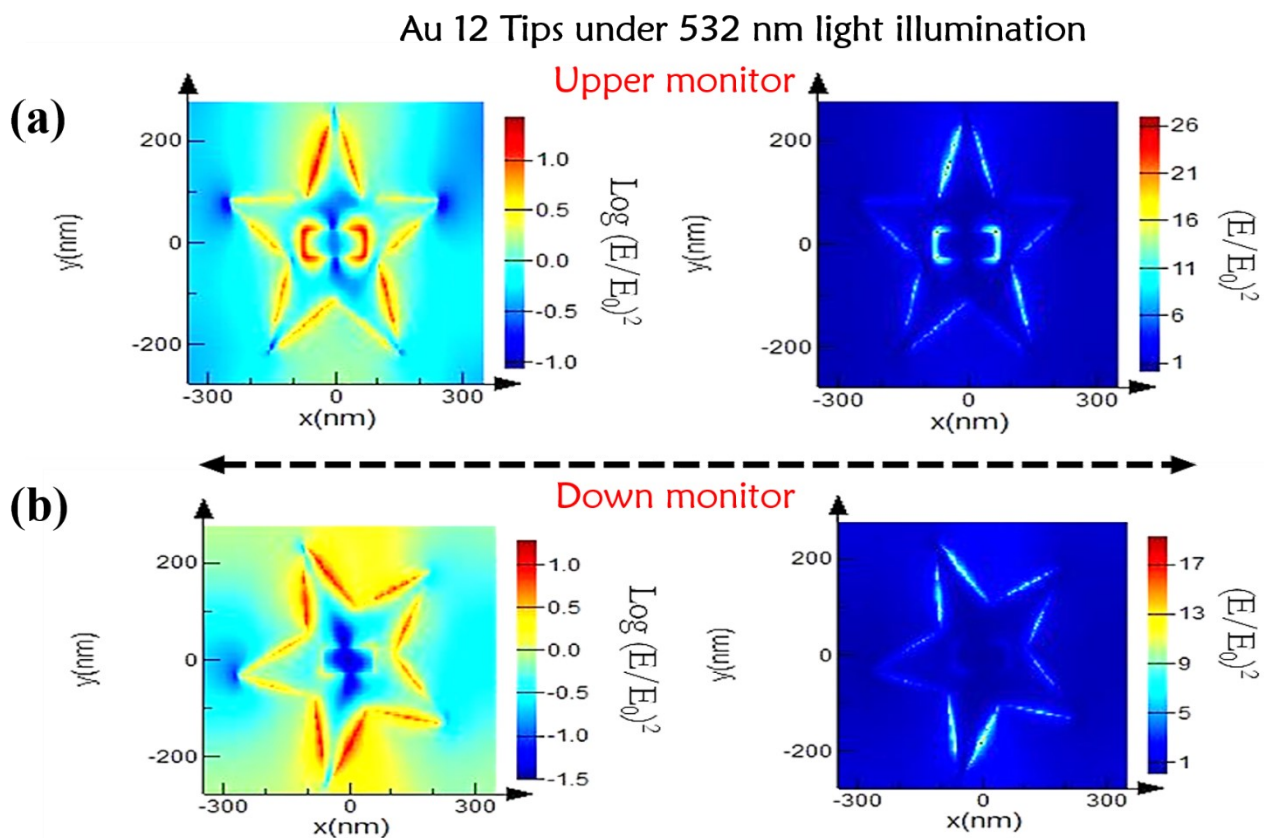

**Figure S14.** FDTD calculated the local electric field Au 12 tips under 532 nm (a) upper monitor and (b) down the monitor.

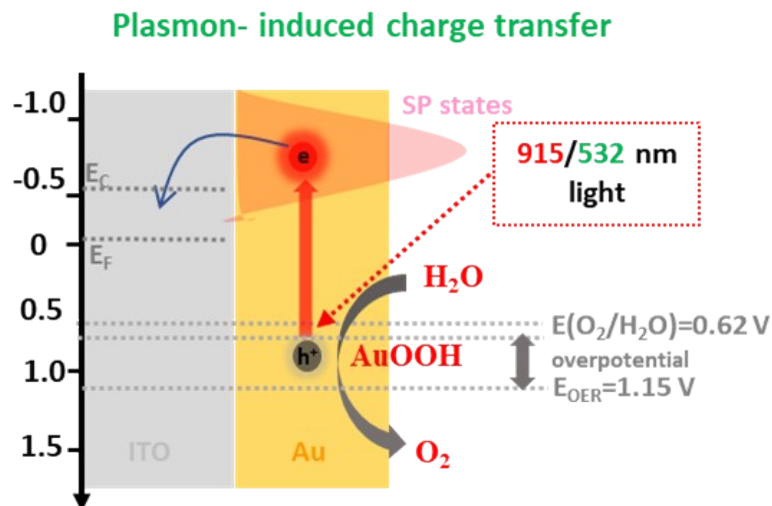

**Figure S15.** Schematic illustration of photocatalytic mechanism of OER on Au 12 tips-electrode.

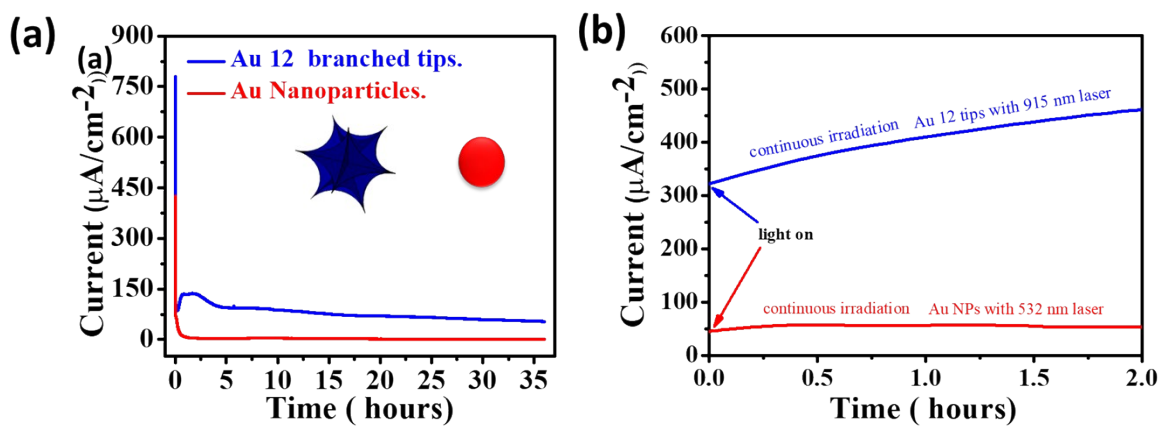

**Figure S16.** (a) Stability test performed on Au 12 tips- and Au NPs-electrodes in the dark. (b) Chrono potentiometric curves of Au 12 tips and Au NPs electrodes under laser irradiation, respectively. The externally applied voltage is 0.6 V vs. RHE.

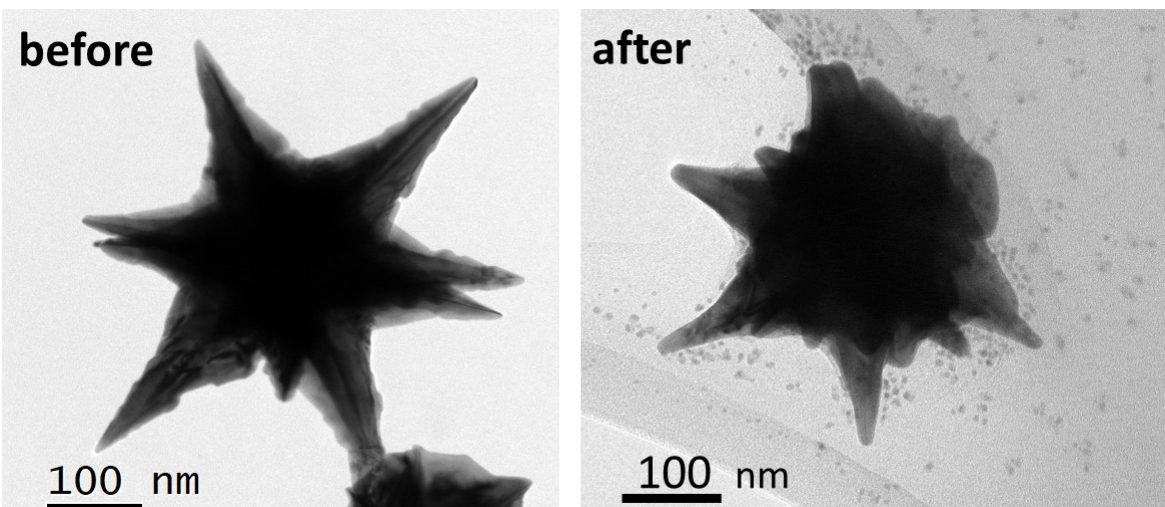

**Figure S17.** TEM images for Au 12 tips nanostars before catalytic performance and after catalytic performance.

**Table S1** High index facets of Au 12 tips nanostars with different projection angles.

| Angle with {100} | 55°   | 35°   | 25°   | 19°   | 15°   | 13°   | 11°   |
|------------------|-------|-------|-------|-------|-------|-------|-------|
| {h11}            | {111} | {211} | {311} | {411} | {511} | {611} | {711} |

**Table S2** Summary of recent developments regarding oxygen evolution reaction (OER) using plasmonic photoelectrodes.

| Plasmonic Photoelectrode            | Electrolyte                           | Light Source                                              | Photocurrent density (mA/cm <sup>2</sup> ) | Ref. |
|-------------------------------------|---------------------------------------|-----------------------------------------------------------|--------------------------------------------|------|
| Au@TiO <sub>2</sub> nanotube arrays | 1.0 M KOH                             | 150 W Xenon lamp<br>cutoff filter >415 nm                 | 0.1 mA/cm <sup>2</sup> vs. RHE             | S1   |
| Au@BiVO <sub>4</sub>                | 0.1 M PBS                             | 300 W Xenon lamp<br>AM 1.5 Filter 100 mW cm <sup>-2</sup> | 0.6 mA/cm <sup>2</sup> vs. RHE             | S2   |
| Au@WO <sub>3</sub>                  | 0.5 M Na <sub>2</sub> SO <sub>4</sub> | 150 W Xenon lamp<br>AM 1.5 Filter 100 mW cm <sup>-2</sup> | 0.8 mA/cm <sup>2</sup> vs Ag/AgCl          | S3   |

|                                                      |                                       |                                                           |                                       |                     |
|------------------------------------------------------|---------------------------------------|-----------------------------------------------------------|---------------------------------------|---------------------|
| SiO <sub>2</sub> @Ag/BiVO <sub>4</sub>               | 0.5 M KH <sub>2</sub> PO <sub>4</sub> | 300 W Xenon lamp<br>AM 1.5 Filter 100 mW cm <sup>-2</sup> | 5.0 mA/cm <sup>-2</sup> vs. Ag/AgCl   | S4                  |
| Au NPs@Ti <sub>3</sub> C <sub>2</sub> T <sub>x</sub> | 1.0 M KOH                             | 525 nm laser 100 mW cm <sup>-2</sup>                      | 8.0 mA/cm <sup>-2</sup> vs. RHE       | S5                  |
| BiVO <sub>4</sub> /Co(OH) <sub>x</sub> -Ag           | 0.5 M Na <sub>2</sub> SO <sub>4</sub> | 300 W Xenon lamp<br>AM 1.5 Filter 100 mW cm <sup>-2</sup> | 4.0 mA/cm <sup>-2</sup> vs. RHE       | S6                  |
| Ag@BiVO <sub>4</sub>                                 | 0.5 M Na <sub>2</sub> SO <sub>4</sub> | 300 W Xenon lamp<br>AM 1.5 Filter 100 mW cm <sup>-2</sup> | 1.7 mA/cm <sup>-2</sup> vs. RHE       | S7                  |
| Au NRs                                               | 1.0 M KOH                             | 808 nm laser, 200 mW cm <sup>-2</sup>                     | 0.5 mA/cm <sup>-2</sup> vs. RHE       | S8                  |
| <b>Au 12 tips-electrode</b>                          | <b>0.1 M KOH</b>                      | <b>915 nm laser 300 mW cm<sup>-2</sup></b>                | <b>1.8 mA/cm<sup>-2</sup> vs. RHE</b> | <b>Current work</b> |

### TDPB surfactant crystal structure information

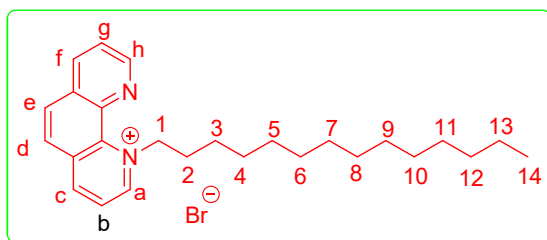

Apple white powder; <sup>1</sup>H NMR (600 MHz, CDCl<sub>3</sub>): δ 10.33 (s, 1 H), 9.40 (d, J= 12.0 Hz, 1 H), 9.18 (s, 1 H), 8.54 (d, J= 6.0 Hz, 1 H), 8.50 (d, J= 6.0 Hz, 1H), 8.34 (d, J= 6.0 Hz, 1H), 8.21 (d, J= 12.0 Hz, 1H), 7.87 (d, J= 12.0 Hz, 1H), 6.13 (t, J= 6.0 Hz, 2H), 2.09-2.06 (m, 2H), 1.56 -1.54 (m, 2H), 1.34-1.32 (m, 2H), 1.24 – 1.18 (m, 20 H), 0.81 (t, J = 6.0 Hz, 3 H).

<sup>13</sup>C NMR (150 MHz, CDCl<sub>3</sub>): 150.8, 149.1, 146.7, 139.2, 137.4, 135.8, 132.2, 131.5, 130.4, 126.9, 124.8, 124.6, 63.8, 31.4, 31.2, 28.9, 28.9, 28.8, 28.6, 28.5, 25.7, 21.9, and 13.4.

### ORTEP diagram of the solid product surfactant

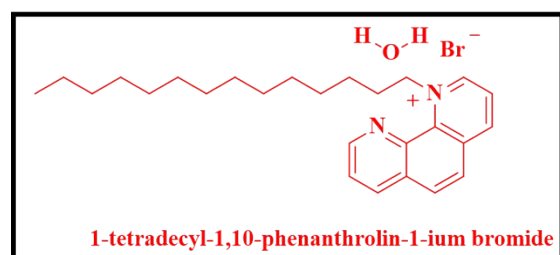

≡

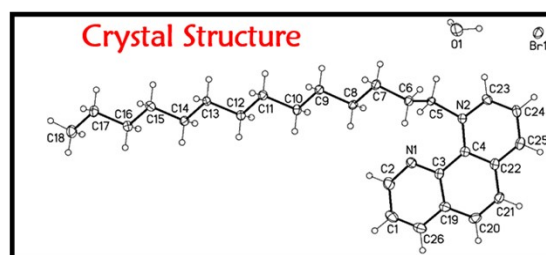

Crystal data and structure refinement for mo\_160548LT\_0m.

|                                   |                                                     |                  |
|-----------------------------------|-----------------------------------------------------|------------------|
| Identification code               | mo_160548LT_0m                                      |                  |
| Empirical formula                 | C <sub>26</sub> H <sub>39</sub> Br N <sub>2</sub> O |                  |
| Formula weight                    | 475.50                                              |                  |
| Temperature                       | 100(2) K                                            |                  |
| Wavelength                        | 0.71073 Å                                           |                  |
| Crystal system                    | Triclinic                                           |                  |
| Space group                       | P -1                                                |                  |
| Unit cell dimensions              | a = 8.6383(17) Å                                    | a = 102.453(5)°. |
|                                   | b = 11.793(2) Å                                     | b = 91.642(5)°.  |
|                                   | c = 25.970(6) Å                                     | g = 108.802(5)°. |
| Volume                            | 2431.8(9) Å <sup>3</sup>                            |                  |
| Z                                 | 4                                                   |                  |
| Density (calculated)              | 1.299 Mg/m <sup>3</sup>                             |                  |
| Absorption coefficient            | 1.710 mm <sup>-1</sup>                              |                  |
| F(000)                            | 1008                                                |                  |
| Crystal size                      | 0.15 x 0.10 x 0.10 mm <sup>3</sup>                  |                  |
| Theta range for data collection   | 0.808 to 26.532°.                                   |                  |
| Index ranges                      | -10<=h<=9, -14<=k<=14, -31<=l<=32                   |                  |
| Reflections collected             | 37218                                               |                  |
| Independent reflections           | 10037 [R(int) = 0.0679]                             |                  |
| Completeness to theta = 25.242°   | 100.0 %                                             |                  |
| Absorption correction             | Semi-empirical from equivalents                     |                  |
| Max. and min. transmission        | 0.9485 and 0.8634                                   |                  |
| Refinement method                 | Full-matrix least-squares on F <sup>2</sup>         |                  |
| Data / restraints / parameters    | 10037 / 0 / 543                                     |                  |
| Goodness-of-fit on F <sup>2</sup> | 0.993                                               |                  |
| Final R indices [I>2sigma(I)]     | R1 = 0.0396, wR2 = 0.0845                           |                  |
| R indices (all data)              | R1 = 0.0759, wR2 = 0.1012                           |                  |
| Extinction coefficient            | n/a                                                 |                  |
| Largest diff. peak and hole       | 0.438 and -0.439 e.Å <sup>-3</sup>                  |                  |

**Supporting reference:**

- S1. S. Y. Moon, H.C. Song, E. H. Gwag, I.I. Nedrygailov, C Lee, J. J. Kim, W, H, Doh, and J, Y, Park. *Nanoscale*, 2018, **10**, 22180–22188.
- S2. T. G. U. Ghobadi, A. Ghobadi, M. C. Soydan, M. B. Vishlagh, S. Kaya, F. Karadas, E. Ozbay *ChemSusChem*, 2020, **13**, 2577 –2588.
- S3. Y. Liu, Y. S. Chang, Y. J. Hsu, B. J. Hwang, and C. H. Hsueh, *Electrochim. Acta*, 2019, **321**,134674
- S4. S. Caliskan, J. K. Kim, G. S. Han, F. Qin, I. S. Cho, H. S. Han, and J. K. Lee, *ACS Appl. Energy Mater.*, 2020, **3**, 11886–11892.
- S5. J. Wang, X. Wei, X. Wang, W. Song, W. Zhong, M. Wang, J. Ju, and Y. Tang, *Inorg. Chem.*, 2021, **60**, 5890–5897.
- S6. X. Ning, D. Yin, Y. Fan, Q. Zhang, P. Du, D. Zhang, J. Chen, and X. Lu, *Adv. Energy Mater.*, 2021, **11**, 2100405.
- S7. S. Y. Jeong, H. M. Shin, Y. R. Jo, Y. J. Kim, S. Kim, W. J. Lee, G. J. Lee, J. Song, B. J. Moon, S. Seo, H. An, S. H. Lee, Y. M. Song, B.J. Kim, M. H. Yoon, and S. Lee, *J. Phys. Chem. C*, 2018, **122**, 7088–7093.
- S8. W. Zhang, S. Wang, S. A. Yang, X. H. Xia, and Y. G. Zhou, *Nanoscale*, 2020, **12**, 17290–17297.
